# Supplementary material
Source: publisher figshare collection journal article supplement (https://acs.figshare.com/ndownloader/files/15532961)
Supplement: Supplementary file 1 [file 15532961]

## **Supporting Information**

### **An Image-Guided Intrasccaffold Cell Assembly Technique for Accurate Printing of Heterogeneous Tissue Constructs**

Kevin F. Firouzian<sup>1,2,3</sup>, Ting Zhang<sup>1,2,3\*</sup>, Hefeng Zhang<sup>1,2</sup>, Yu Song<sup>1,2,3</sup>, Xiaolei Su<sup>1,2,3</sup>, and Feng Lin<sup>1,2,3s</sup>

<sup>1</sup>Biomanufacturing Center, Department of Mechanical Engineering, Tsinghua University, Beijing 100084, China

<sup>2</sup>Biomanufacturing and Rapid Forming Technology Key Laboratory of Beijing, Department of Mechanical Engineering, Tsinghua University, Beijing 100084, China

<sup>3</sup>111”Biomanufacturing and Engineering Living Systems” Innovation International Talents Base, Department of Mechanical Engineering, Tsinghua University, Beijing 100084, China

\*Email: t-zhang@tsinghua.edu.cn

**Number of Pages:** 2 (Pages S1-S2)

**Number of Figures:** 2 (Figures S1-S2)

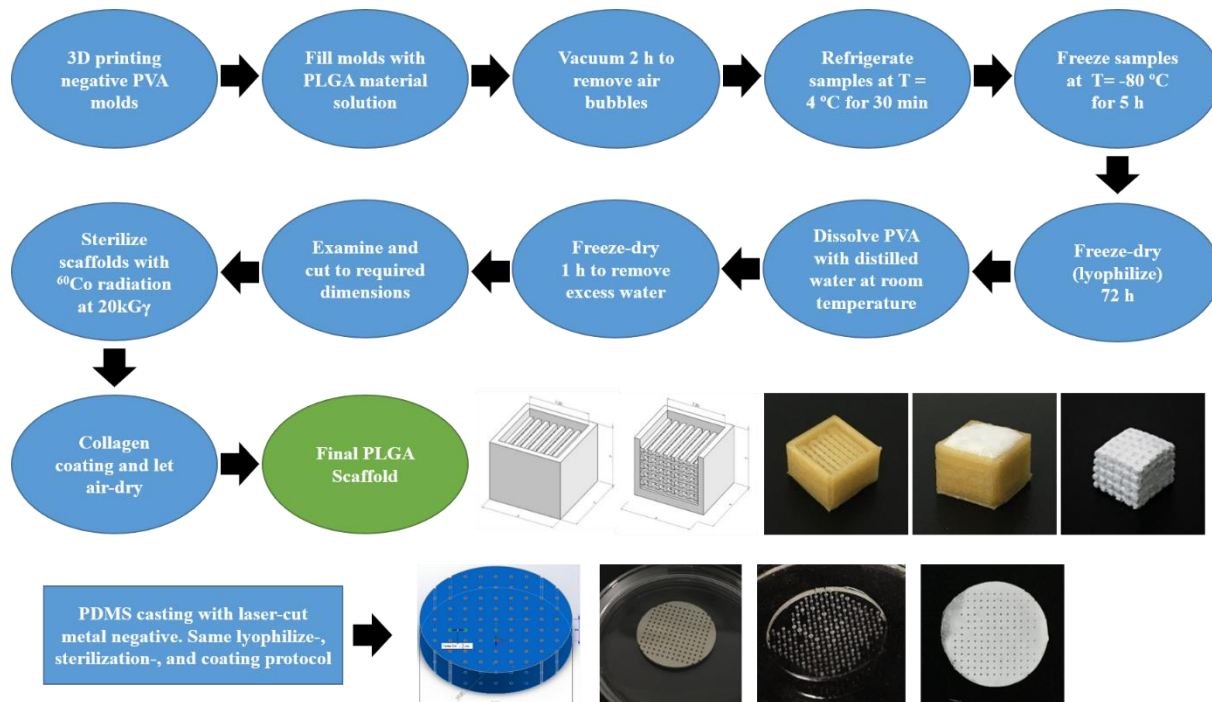

**Figure S1.** Scaffold fabrication processes. Flowchart highlighting main protocol(s) for creating 500  $\mu\text{m}$  pore diameter poly(lactic-co-glycolic acid) (PLGA) spatial-grid design scaffolds with interconnecting pore structure via water-soluble poly(vinyl alcohol) (PVA) negative casting molds and 200  $\mu\text{m}$  pore diameter PLGA scaffolds with axial pore structure via poly(dimethylsiloxane) (PDMS) stamp casting. Negative casting molds are 3D printed with adequate line width and line-to-line spacing to ensure a positive PLGA scaffold with the same design. Scaffold are placed in a vacuum chamber for 2 h to ensure removal of air bubbles to avoid defects during freeze-drying (lyophilization). Samples are first refrigerated and then frozen to ensure gradual temperature decrease and uniform material solidification. Lyophilized of 72 h ensures complete drying and removal of harmful solvents. PVA negative is dissolved in distilled water (frequently changed), at room temperature, during constant stirring. Pre-sterilization, samples are examined and cut/shaped into desired dimensions to remove minor defect/imperfections. PDMS stamp casted scaffolds are made using the same processes albeit with pre-made, laser-cut, metal negatives instead.

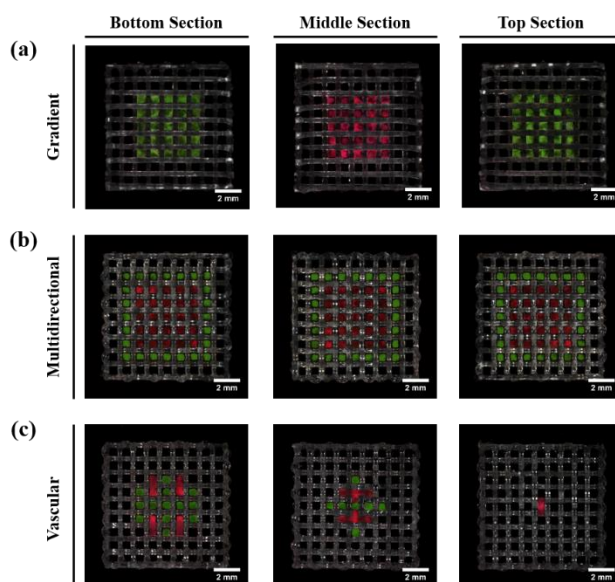

**Figure S2.** Complex intrascaffold assembly. (a-c) Highlighting four-layer sectional views of bottom-, middle-, and top sections of the gradient-, multidirectional-, and vascular complex structures made via complex intrascaffold assembly of fluorescent dye blended hydrogels within pre-made transparent polylactic acid (PLA) scaffolds. All scaffolds have 500  $\mu\text{m}$  pore diameter. Images highlight sectional views of the complex structures that were sliced and sectioned post-printing and show intrascaffold assembly structural transitions at four-layer intervals. Areas with varying color intensities as shown in the vascular structure (c) in the bottom- and middle sections refer to material deposition at varying depth within the respective four layers. Scale 2 mm.
